# Supplementary material for: Blue photoluminescent zinc coordination polymers with supertetranuclear cores
Source: Royal Society of Chemistry journal article supplement (doi:10.1039/b005753n), 2000-01-01
Supplement: b005753n.doc [file b005753n.doc]

# *Supplementary Data*: X-ray powder diffraction data for complexes **1** and **2**

# Instrument: Rigaku D/Max-3A; Radiation: CuK (1.54 Å); Method: 2nd differential; typical width: 0.1 deg.

# Complex **1**

| Peak no. | 2theta | FWHM | d-value | Intensity | I/Io | Peak no. | 2theta | FWHM | d-value | Intensity | I/Io |
| --- | --- | --- | --- | --- | --- | --- | --- | --- | --- | --- | --- |
| 1 | 9.00 | 0.118 | 9.81 | 106 | 10 | 28 | 27.48 | 0.094 | 3.24 | 59 | 6 |
| 2 | 9.40 | 0.071 | 9.40 | 72 | 7 | 29 | 30.30 | 0.071 | 2.94 | 99 | 9 |
| 3 | 9.58 | 0.071 | 9.22 | 55 | 5 | 30 | 30.84 | 0.071 | 2.89 | 168 | 15 |
| 4 | 10.18 | 0.094 | 8.68 | 1122 | 100 | 31 | 34.16 | 0.071 | 2.62 | 73 | 7 |
| 5 | 10.90 | 0.071 | 8.11 | 131 | 12 | 32 | 34.64 | 0.071 | 2.58 | 152 | 14 |
| 6 | 11.06 | 0.094 | 7.99 | 133 | 12 | 33 | 34.84 | 0.071 | 2.57 | 67 | 6 |
| 7 | 11.34 | 0.071 | 7.79 | 417 | 38 | 34 | 35.74 | 0.118 | 2.51 | 70 | 7 |
| 8 | 14.18 | 0.118 | 6.24 | 113 | 11 | 35 | 36.54 | 0.071 | 2.45 | 59 | 6 |
| 9 | 14.36 | 0.118 | 6.16 | 81 | 8 | 36 | 37.56 | 0.071 | 2.39 | 71 | 7 |
| 10 | 15.52 | 0.071 | 5.70 | 101 | 9 | 37 | 37.78 | 0.071 | 2.37 | 88 | 8 |
| 11 | 16.38 | 0.071 | 5.40 | 145 | 13 | 38 | 39.12 | 0.094 | 2.30 | 380 | 34 |
| 12 | 16.64 | 0.071 | 5.32 | 72 | 7 | 39 | 39.42 | 0.071 | 2.28 | 52 | 5 |
| 13 | 16.90 | 0.118 | 5.24 | 230 | 21 | 40 | 40.56 | 0.118 | 2.22 | 207 | 19 |
| 14 | 17.46 | 0.071 | 5.07 | 63 | 6 | 41 | 40.94 | 0.071 | 2.20 | 74 | 7 |
| 15 | 18.02 | 0.071 | 4.91 | 51 | 5 | 42 | 41.52 | 0.071 | 2.17 | 93 | 9 |
| 16 | 18.22 | 0.071 | 4.86 | 97 | 9 | 43 | 41.74 | 0.071 | 2.16 | 65 | 6 |
| 17 | 18.98 | 0.071 | 4.67 | 85 | 8 | 44 | 43.92 | 0.118 | 2.05 | 85 | 8 |
| 18 | 19.06 | 0.071 | 4.65 | 112 | 11 | 45 | 45.80 | 0.118 | 1.97 | 58 | 6 |
| 19 | 20.26 | 0.118 | 4.37 | 620 | 56 | 46 | 46.16 | 0.094 | 1.96 | 344 | 31 |
| 20 | 20.44 | 0.118 | 4.34 | 549 | 49 | 47 | 47.34 | 0.071 | 1.91 | 52 | 5 |
| 21 | 21.12 | 0.071 | 4.20 | 54 | 5 | 48 | 48.18 | 0.071 | 1.88 | 266 | 24 |
| 22 | 22.64 | 0.094 | 3.92 | 363 | 33 | 49 | 49.10 | 0.071 | 1.85 | 55 | 5 |
| 23 | 24.74 | 0.071 | 3.59 | 81 | 8 | 50 | 55.14 | 0.071 | 1.66 | 67 | 6 |
| 24 | 25.02 | 0.071 | 3.55 | 58 | 6 | 51 | 56.32 | 0.071 | 1.63 | 50 | 5 |
| 25 | 25.90 | 0.071 | 3.43 | 100 | 9 | 52 | 62.52 | 0.071 | 1.48 | 54 | 5 |
| 26 | 26.08 | 0.071 | 3.41 | 125 | 12 | 53 | 62.66 | 0.071 | 1.48 | 83 | 8 |
| 27 | 26.96 | 0.071 | 3.30 | 205 | 19 |  |  |  |  |  |  |

# Complex **2**

| Peak no. | 2theta | FWHM | d-value | Intensity | I/Io | Peak no. | 2theta | FWHM | d-value | Intensity | I/Io |
| --- | --- | --- | --- | --- | --- | --- | --- | --- | --- | --- | --- |
| 1 | 10.060 | 0.071 | 8.7851 | 174 | 59 | 31 | 29.480 | 0.071 | 3.0273 | 56 | 19 |
| 2 | 10.140 | 0.094 | 8.7160 | 160 | 54 | 32 | 30.140 | 0.071 | 2.9625 | 57 | 20 |
| 3 | 10.620 | 0.094 | 8.3231 | 189 | 64 | 33 | 31.420 | 0.071 | 2.8447 | 52 | 18 |
| 4 | 11.240 | 0.094 | 7.8653 | 297 | 100 | 34 | 31.700 | 0.118 | 2.8202 | 67 | 23 |
| 5 | 12.480 | 0.094 | 7.0865 | 84 | 29 | 35 | 31.880 | 0.094 | 2.8047 | 51 | 18 |
| 6 | 12.660 | 0.071 | 6.9861 | 87 | 30 | 36 | 32.480 | 0.165 | 2.7542 | 85 | 29 |
| 7 | 12.720 | 0.071 | 6.9533 | 137 | 47 | 37 | 32.660 | 0.071 | 2.7395 | 59 | 20 |
| 8 | 14.480 | 0.071 | 6.1119 | 128 | 44 | 38 | 33.140 | 0.165 | 2.7009 | 127 | 43 |
| 9 | 16.600 | 0.094 | 5.3358 | 81 | 28 | 39 | 33.880 | 0.071 | 2.6436 | 83 | 28 |
| 10 | 17.940 | 0.094 | 4.9402 | 73 | 25 | 40 | 34.020 | 0.094 | 2.6330 | 63 | 22 |
| 11 | 18.620 | 0.071 | 4.7612 | 51 | 18 | 41 | 34.340 | 0.118 | 2.6092 | 54 | 19 |
| 12 | 19.200 | 0.071 | 4.6187 | 67 | 23 | 42 | 35.360 | 0.118 | 2.5362 | 55 | 19 |
| 13 | 20.120 | 0.071 | 4.4095 | 49 | 17 | 43 | 36.120 | 0.118 | 2.4846 | 92 | 31 |
| 14 | 20.300 | 0.071 | 4.3708 | 147 | 50 | 44 | 36.300 | 0.071 | 2.4727 | 97 | 33 |
| 15 | 20.400 | 0.071 | 4.3496 | 156 | 53 | 45 | 37.340 | 0.118 | 2.4062 | 45 | 16 |
| 16 | 20.500 | 0.071 | 4.3286 | 48 | 17 | 46 | 39.880 | 0.071 | 2.2586 | 69 | 24 |
| 17 | 22.000 | 0.071 | 4.0368 | 53 | 18 | 47 | 41.300 | 0.094 | 2.1841 | 50 | 17 |
| 18 | 22.180 | 0.071 | 4.0044 | 83 | 28 | 48 | 41.940 | 0.071 | 2.1523 | 53 | 18 |
| 19 | 22.300 | 0.071 | 3.9832 | 70 | 24 | 49 | 42.460 | 0.118 | 2.1271 | 52 | 18 |
| 20 | 24.260 | 0.094 | 3.6656 | 55 | 19 | 50 | 42.880 | 0.118 | 2.1072 | 46 | 16 |
| 21 | 24.380 | 0.071 | 3.6478 | 114 | 39 | 51 | 43.740 | 0.094 | 2.0678 | 48 | 17 |
| 22 | 24.480 | 0.071 | 3.6332 | 190 | 65 | 52 | 44.120 | 0.165 | 2.0509 | 139 | 47 |
| 23 | 25.520 | 0.118 | 3.4874 | 187 | 64 | 53 | 46.820 | 0.071 | 1.9387 | 62 | 21 |
| 24 | 25.740 | 0.094 | 3.4581 | 142 | 48 | 54 | 48.740 | 0.141 | 1.8667 | 108 | 37 |
| 25 | 26.140 | 0.071 | 3.4061 | 64 | 22 | 55 | 48.920 | 0.071 | 1.8603 | 68 | 23 |
| 26 | 26.760 | 0.071 | 3.3286 | 88 | 30 | 56 | 49.540 | 0.071 | 1.8384 | 67 | 23 |
| 27 | 26.880 | 0.094 | 3.3140 | 123 | 42 | 57 | 56.540 | 0.141 | 1.6263 | 64 | 22 |
| 28 | 27.380 | 0.071 | 3.2546 | 119 | 41 | 58 | 58.660 | 0.071 | 1.5725 | 53 | 18 |
| 29 | 28.080 | 0.165 | 3.1750 | 100 | 34 | 59 | 65.800 | 0.118 | 1.4181 | 52 | 18 |
| 30 | 29.340 | 0.094 | 3.0415 | 115 | 39 | 60 | 67.820 | 0.094 | 1.3807 | 52 | 18 |
